# Supplementary material for: Phytohormones as Regulators of Mitochondrial Gene Expression in Arabidopsis thaliana
Source: MDPI journal article supplement (doi:10.3390/ijms242316924), 2023-11-29
Supplement: s1 [file s1]

## SUPPLEMENTARY DATA

### Phytohormones as Regulators of Mitochondrial Gene Expression in *Arabidopsis thaliana*

**Ivan A. Bychkov<sup>1</sup>, Elena S. Pojidaeva<sup>1</sup>, Anastasia S. Doroshenko<sup>1</sup>, Vladimir A. Khripach<sup>2</sup>,  
Natalia V. Kudryakova<sup>1,\*</sup> and Victor V. Kusnetsov<sup>1,\*</sup>**

<sup>1</sup> Timiryazev Institute of Plant Physiology, Russian Academy of Sciences, Moscow 127276, Russia

<sup>2</sup> Institute of Bioorganic Chemistry, National Academy of Sciences of Belarus, 220072 Minsk, Belarus

\* Correspondence: nvkudryakova@mail.ru (N.V.K.); vkusnetsov2001@mail.ru (V.V.K.)

**Table S1.** Effects of hormone treatment on relative expression values of marker genes involved in plant responses to exogenous hormones. WT plants were treated with solutions of hormones or an equal aliquot of ethanol for 3h. The compounds assayed included abscisic acid (ABA,  $5 \times 10^{-5}$  M), gibberellic acid (GA3,  $10^{-6}$  M), indole-3-acetic acid (IAA, auxin,  $10^{-6}$  M), 1-aminocyclopropane-1-carboxylic acid (ACC; ethylene precursor,  $10^{-5}$  M), *trans*-zeatin (CK,  $5 \times 10^{-6}$  M), brassinolide (BL,  $10^{-7}$  M), salicylic acid (SA,  $10^{-5}$  M) and methyl jasmonate (MJ,  $5 \times 10^{-5}$  M). Asterisks indicate statistically significant differences between the control variant and the treatment at  $p < 0.05$  (t-test).

| Treatment          | Transcript level |
|--------------------|------------------|
| <i>IAA19</i>       |                  |
| WT MS              | 1.000 ± 0.116    |
| WT IAA             | 2.815 ± 0.271*   |
| <i>DWF4</i>        |                  |
| WT MS              | 1.000 ± 0.131    |
| WT BL              | 0.515 ± 0.062*   |
| <i>GA3</i>         |                  |
| WT MS              | 1.000 ± 0.144    |
| WT GA <sub>3</sub> | 0.021 ± 0.003*   |
| <i>ERF1</i>        |                  |
| WT MS              | 1.000 ± 0.089    |
| WT ACC             | 3.193 ± 0.325*   |
| WT MJ              | 2.992 ± 0.281*   |
| <i>RD29</i>        |                  |
| WT MS              | 1.000 ± 0.104    |
| WT ABA             | 4.318 ± 0.401*   |
| <i>ARR5</i>        |                  |
| WT MS              | 1.000 ± 0.152    |
| WT CK              | 22.623 ± 4.016*  |
| <i>PR1</i>         |                  |
| WT MS              | 1.000 ± 0.117    |
| WT SA              | 3.531 ± 0.366*   |

**Table S2.** Effect of phytohormone treatment on relative gene expression values of mitochondrial and nuclear genes *A. thaliana*. The wild-type and *rpotmp* mutant plants were grown on MS medium in Petri dishes at an illumination of 50  $\mu\text{mol m}^{-2}\text{s}^{-1}$ , a temperature of 23 °C with a 16 h photoperiod. 10-day-old seedlings were treated with the solutions of hormones and collected after 3 h of exposure. Total RNAs were isolated from seedlings and analyzed by relative quantitative RT-PCR using *UBQ10* and *PP2A* as internal standards. The data presented in the table are the mean values ( $n \geq 3$ ). Error bars represent SEs. Different letters denote statistically significant differences between variants within the same genotype at  $p < 0.05$  (ANOVA with post hoc Tukey's multiple-comparison test); asterisks indicate statistically significant differences between the control variants of mutants and the wild type at  $p < 0.05$  (t-test).

|                 | MS                              | CK                              | IAA                             | BL                              | GA3                            | ACC                             | ABA                            | MetJa                           | SA                              |
|-----------------|---------------------------------|---------------------------------|---------------------------------|---------------------------------|--------------------------------|---------------------------------|--------------------------------|---------------------------------|---------------------------------|
| <i>nad6</i>     |                                 |                                 |                                 |                                 |                                |                                 |                                |                                 |                                 |
| WT              | 1.000 $\pm$ 0.096 <sup>b</sup>  | 2.520 $\pm$ 0.311 <sup>c</sup>  | 2.426 $\pm$ 0.199 <sup>c</sup>  | 2.040 $\pm$ 0.217 <sup>c</sup>  | 2.624 $\pm$ 0.285 <sup>c</sup> | 2.255 $\pm$ 0.233 <sup>c</sup>  | 2.279 $\pm$ 0.219 <sup>c</sup> | 0.431 $\pm$ 0.051 <sup>a</sup>  | 1.739 $\pm$ 0.144 <sup>c</sup>  |
| <i>rpotmp-2</i> | 0.392 $\pm$ 0.040 <sup>b*</sup> | 0.151 $\pm$ 0.016 <sup>a</sup>  | 0.291 $\pm$ 0.032 <sup>b</sup>  | 0.280 $\pm$ 0.025 <sup>b</sup>  | 0.313 $\pm$ 0.026 <sup>b</sup> | 0.575 $\pm$ 0.066 <sup>c</sup>  | 0.118 $\pm$ 0.009 <sup>a</sup> | 0.184 $\pm$ 0.022 <sup>ab</sup> | 0.426 $\pm$ 0.051 <sup>c</sup>  |
| <i>nad3</i>     |                                 |                                 |                                 |                                 |                                |                                 |                                |                                 |                                 |
| WT              | 1.000 $\pm$ 0.141 <sup>b</sup>  | 1.398 $\pm$ 0.161 <sup>bc</sup> | 1.388 $\pm$ 0.135 <sup>bc</sup> | 1.427 $\pm$ 0.156 <sup>bc</sup> | 1.547 $\pm$ 0.174 <sup>c</sup> | 1.751 $\pm$ 0.189 <sup>c</sup>  | 1.265 $\pm$ 0.142 <sup>b</sup> | 0.378 $\pm$ 0.044 <sup>a</sup>  | 0.913 $\pm$ 0.107 <sup>b</sup>  |
| <i>rpotmp-2</i> | 2.975 $\pm$ 0.329 <sup>b*</sup> | 2.590 $\pm$ 0.301 <sup>a</sup>  | 3.506 $\pm$ 0.151 <sup>b</sup>  | 4.367 $\pm$ 0.514 <sup>b</sup>  | 2.835 $\pm$ 0.298 <sup>b</sup> | 4.141 $\pm$ 0.423 <sup>c</sup>  | 2.133 $\pm$ 0.222 <sup>a</sup> | 1.372 $\pm$ 0.142 <sup>ab</sup> | 4.112 $\pm$ 0.399 <sup>c</sup>  |
| <i>cob</i>      |                                 |                                 |                                 |                                 |                                |                                 |                                |                                 |                                 |
| WT              | 1.000 $\pm$ 0.119 <sup>b</sup>  | 2.004 $\pm$ 0.195 <sup>c</sup>  | 1.569 $\pm$ 0.163 <sup>c</sup>  | 1.892 $\pm$ 0.232 <sup>c</sup>  | 1.849 $\pm$ 0.202 <sup>c</sup> | 1.894 $\pm$ 0.202 <sup>c</sup>  | 1.587 $\pm$ 0.211 <sup>c</sup> | 0.132 $\pm$ 0.255 <sup>a</sup>  | 1.363 $\pm$ 0.152 <sup>bc</sup> |
| <i>rpotmp-2</i> | 1.401 $\pm$ 0.135 <sup>c*</sup> | 0.971 $\pm$ 0.089 <sup>b</sup>  | 0.644 $\pm$ 0.065 <sup>a</sup>  | 1.055 $\pm$ 0.120 <sup>b</sup>  | 0.870 $\pm$ 0.096 <sup>b</sup> | 1.838 $\pm$ 0.204 <sup>c</sup>  | 0.677 $\pm$ 0.074 <sup>a</sup> | 0.550 $\pm$ 0.061 <sup>a</sup>  | 1.560 $\pm$ 0.125 <sup>c</sup>  |
| <i>cox1</i>     |                                 |                                 |                                 |                                 |                                |                                 |                                |                                 |                                 |
| WT              | 1.000 $\pm$ 0.125 <sup>b</sup>  | 2.227 $\pm$ 0.219 <sup>c</sup>  | 2.135 $\pm$ 0.191 <sup>c</sup>  | 1.929 $\pm$ 0.265 <sup>c</sup>  | 1.992 $\pm$ 0.213 <sup>c</sup> | 2.128 $\pm$ 0.215 <sup>c</sup>  | 1.246 $\pm$ 0.089 <sup>b</sup> | 0.376 $\pm$ 0.40 <sup>a</sup>   | 1.854 $\pm$ 0.177 <sup>c</sup>  |
| <i>rpotmp-2</i> | 0.651 $\pm$ 0.055 <sup>b*</sup> | 0.515 $\pm$ 0.042 <sup>b</sup>  | 0.439 $\pm$ 0.051 <sup>b</sup>  | 0.433 $\pm$ 0.047 <sup>b</sup>  | 0.503 $\pm$ 0.050 <sup>b</sup> | 1.082 $\pm$ 0.119 <sup>c</sup>  | 0.215 $\pm$ 0.031 <sup>a</sup> | 0.312 $\pm$ 0.041 <sup>a</sup>  | 0.912 $\pm$ 0.083 <sup>c</sup>  |
| <i>atp6-1</i>   |                                 |                                 |                                 |                                 |                                |                                 |                                |                                 |                                 |
| WT              | 1.000 $\pm$ 0.096 <sup>c</sup>  | 1.508 $\pm$ 0.111 <sup>d</sup>  | 0.944 $\pm$ 0.066 <sup>c</sup>  | 0.942 $\pm$ 0.055 <sup>c</sup>  | 0.964 $\pm$ 0.059 <sup>c</sup> | 1.197 $\pm$ 0.088 <sup>c</sup>  | 1.002 $\pm$ 0.049 <sup>c</sup> | 0.091 $\pm$ 0.014 <sup>a</sup>  | 0.609 $\pm$ 0.057 <sup>b</sup>  |
| <i>rpotmp-2</i> | 1.854 $\pm$ 0.145 <sup>c*</sup> | 1.039 $\pm$ 0.092 <sup>b</sup>  | 0.626 $\pm$ 0.052 <sup>a</sup>  | 1.633 $\pm$ 0.152 <sup>c</sup>  | 1.149 $\pm$ 0.083 <sup>b</sup> | 2.010 $\pm$ 0.274 <sup>c</sup>  | 0.599 $\pm$ 0.051 <sup>a</sup> | 0.660 $\pm$ 0.042 <sup>a</sup>  | 1.499 $\pm$ 0.154 <sup>bc</sup> |
| <i>ccMc</i>     |                                 |                                 |                                 |                                 |                                |                                 |                                |                                 |                                 |
| WT              | 1.000 $\pm$ 0.121 <sup>b</sup>  | 1.861 $\pm$ 0.121 <sup>c</sup>  | 1.662 $\pm$ 0.066 <sup>c</sup>  | 2.075 $\pm$ 0.169 <sup>c</sup>  | 1.621 $\pm$ 0.078 <sup>c</sup> | 1.442 $\pm$ 0.104 <sup>bc</sup> | 1.674 $\pm$ 0.099 <sup>c</sup> | 0.170 $\pm$ 0.009 <sup>a</sup>  | 1.251 $\pm$ 0.107 <sup>b</sup>  |
| <i>rpotmp-2</i> | 0.738 $\pm$                     | 0.423 $\pm$                     | 0.394 $\pm$                     | 0.681 $\pm$                     | 0.448 $\pm$                    | 0.537 $\pm$                     | 0.389 $\pm$                    | 0.321 $\pm$                     | 0.756 $\pm$                     |

|                 |                             |                            |                             |                            |                             |                            |                            |                            |                            |
|-----------------|-----------------------------|----------------------------|-----------------------------|----------------------------|-----------------------------|----------------------------|----------------------------|----------------------------|----------------------------|
|                 | 0.069 <sup>b*</sup>         | 0.020 <sup>a</sup>         | 0.022 <sup>a</sup>          | 0.050 <sup>b</sup>         | 0.023 <sup>a</sup>          | 0.074 <sup>ab</sup>        | 0.032 <sup>a</sup>         | 0.017 <sup>a</sup>         | 0.054 <sup>b</sup>         |
| <i>ccMFC</i>    |                             |                            |                             |                            |                             |                            |                            |                            |                            |
| WT              | 1.000 ± 0.114 <sup>b</sup>  | 1.760 ± 0.116 <sup>c</sup> | 1.609 ± 0.135 <sup>c</sup>  | 1.909 ± 0.180 <sup>c</sup> | 1.744 ± 0.145 <sup>c</sup>  | 2.087 ± 0.211 <sup>c</sup> | 1.628 ± 0.148 <sup>c</sup> | 0.141 ± 0.011 <sup>a</sup> | 1.114 ± 0.096 <sup>b</sup> |
| <i>rpotmp-2</i> | 5.965 ± 0.611 <sup>b*</sup> | 3.872 ± 0.415 <sup>a</sup> | 2.989 ± 0.167 <sup>a</sup>  | 6.423 ± 0.711 <sup>b</sup> | 4.103 ± 0.325 <sup>ab</sup> | 9.996 ± 1.006 <sup>c</sup> | 3.316 ± 0.298 <sup>a</sup> | 2.687 ± 0.213 <sup>a</sup> | 6.634 ± 0.550 <sup>b</sup> |
| <i>rps4</i>     |                             |                            |                             |                            |                             |                            |                            |                            |                            |
| WT              | 1.000 ± 0.121 <sup>b</sup>  | 1.520 ± 0.141 <sup>c</sup> | 1.322 ± 0.127 <sup>bc</sup> | 1.591 ± 0.172 <sup>c</sup> | 0.984 ± 0.101 <sup>b</sup>  | 0.704 ± 0.082 <sup>b</sup> | 0.868 ± 0.091 <sup>b</sup> | 0.072 ± 0.010 <sup>a</sup> | 0.806 ± 0.077 <sup>b</sup> |
| <i>rpotmp-2</i> | 0.057 ± 0.007 <sup>b*</sup> | 0.056 ± 0.004 <sup>b</sup> | 0.070 ± 0.009 <sup>b</sup>  | 0.083 ± 0.009 <sup>b</sup> | 0.052 ± 0.006 <sup>b</sup>  | 0.050 ± 0.004 <sup>b</sup> | 0.023 ± 0.002 <sup>a</sup> | 0.022 ± 0.003 <sup>a</sup> | 0.051 ± 0.006 <sup>b</sup> |
| <i>mttB</i>     |                             |                            |                             |                            |                             |                            |                            |                            |                            |
| WT              | 1.000 ± 0.113 <sup>b</sup>  | 1.922 ± 0.188 <sup>c</sup> | 2.133 ± 0.201 <sup>c</sup>  | 2.228 ± 0.195 <sup>c</sup> | 2.223 ± 0.195 <sup>c</sup>  | 1.983 ± 0.204 <sup>c</sup> | 1.831 ± 0.197 <sup>c</sup> | 0.580 ± 0.061 <sup>a</sup> | 1.253 ± 0.135 <sup>b</sup> |
| <i>rpotmp-2</i> | 1.463 ± 0.142 <sup>b*</sup> | 1.334 ± 0.125 <sup>b</sup> | 1.772 ± 0.132 <sup>bc</sup> | 2.578 ± 0.287 <sup>c</sup> | 1.532 ± 0.092 <sup>b</sup>  | 1.962 ± 0.177 <sup>c</sup> | 1.440 ± 0.152 <sup>b</sup> | 0.676 ± 0.059 <sup>a</sup> | 2.004 ± 0.187 <sup>c</sup> |
| <i>matR</i>     |                             |                            |                             |                            |                             |                            |                            |                            |                            |
| WT              | 1.000 ± 0.100 <sup>b</sup>  | 1.598 ± 0.159 <sup>c</sup> | 1.328 ± 0.097 <sup>bc</sup> | 1.639 ± 0.171 <sup>c</sup> | 1.557 ± 0.149 <sup>c</sup>  | 0.818 ± 0.087 <sup>b</sup> | 1.507 ± 0.119 <sup>c</sup> | 0.140 ± 0.012 <sup>a</sup> | 1.081 ± 0.102 <sup>b</sup> |
| <i>rpotmp-2</i> | 0.174 ± 0.019 <sup>c*</sup> | 0.123 ± 0.018 <sup>b</sup> | 0.173 ± 0.004 <sup>c</sup>  | 0.164 ± 0.027 <sup>c</sup> | 0.182 ± 0.019 <sup>c</sup>  | 0.216 ± 0.011 <sup>c</sup> | 0.109 ± 0.012 <sup>b</sup> | 0.065 ± 0.008 <sup>a</sup> | 0.173 ± 0.014 <sup>c</sup> |
| <i>rrn26</i>    |                             |                            |                             |                            |                             |                            |                            |                            |                            |
| WT              | 1.000 ± 0.133 <sup>b</sup>  | 1.110 ± 0.121 <sup>b</sup> | 1.361 ± 0.142 <sup>b</sup>  | 0.956 ± 0.088 <sup>b</sup> | 1.188 ± 0.122 <sup>b</sup>  | 2.114 ± 0.319 <sup>c</sup> | 1.049 ± 0.101 <sup>b</sup> | 0.225 ± 0.020 <sup>a</sup> | 0.842 ± 0.103 <sup>b</sup> |
| <i>rpotmp-2</i> | 4.312 ± 0.511 <sup>d*</sup> | 3.110 ± 0.325 <sup>c</sup> | 2.980 ± 0.204 <sup>c</sup>  | 3.669 ± 0.421 <sup>c</sup> | 3.329 ± 0.325 <sup>c</sup>  | 7.559 ± 0.811 <sup>e</sup> | 0.979 ± 0.101 <sup>a</sup> | 1.907 ± 0.185 <sup>b</sup> | 4.496 ± 0.447 <sup>d</sup> |
| <i>rrn4</i>     |                             |                            |                             |                            |                             |                            |                            |                            |                            |
| WT              | 1.000 ± 0.101 <sup>b</sup>  | 1.974 ± 0.214 <sup>c</sup> | 2.541 ± 0.311 <sup>c</sup>  | 1.702 ± 0.102 <sup>c</sup> | 1.107 ± 0.099 <sup>b</sup>  | 0.901 ± 0.088 <sup>b</sup> | 0.614 ± 0.055 <sup>a</sup> | 0.517 ± 0.054 <sup>a</sup> | 0.989 ± 0.099 <sup>b</sup> |
| <i>rpotmp-2</i> | 0.913 ± 0.087 <sup>b</sup>  | 0.712 ± 0.068 <sup>b</sup> | 0.811 ± 0.063 <sup>b</sup>  | 0.815 ± 0.091 <sup>b</sup> | 0.804 ± 0.075 <sup>b</sup>  | 0.831 ± 0.107 <sup>b</sup> | 0.479 ± 0.051 <sup>a</sup> | 0.498 ± 0.012 <sup>a</sup> | 0.810 ± 0.074 <sup>b</sup> |
| <i>mTERF15</i>  |                             |                            |                             |                            |                             |                            |                            |                            |                            |
| WT              | 1.000 ± 0.098 <sup>c</sup>  | 1.678 ± 0.168 <sup>d</sup> | 5.966 ± 0.601 <sup>e</sup>  | 2.357 ± 0.213 <sup>d</sup> | 1.755 ± 0.134 <sup>d</sup>  | 3.009 ± 0.288 <sup>d</sup> | 0.551 ± 0.060 <sup>b</sup> | 0.245 ± 0.022 <sup>a</sup> | 0.442 ± 0.039 <sup>b</sup> |
| <i>rpotmp-2</i> | 0.485 ± 0.057 <sup>c</sup>  | 0.856 ± 0.107 <sup>d</sup> | 2.002 ± 0.176 <sup>e</sup>  | 1.022 ± 0.099 <sup>d</sup> | 0.610 ± 0.063 <sup>cd</sup> | 0.904 ± 0.087 <sup>d</sup> | 0.202 ± 0.018 <sup>b</sup> | 0.131 ± 0.010 <sup>a</sup> | 0.300 ± 0.034 <sup>b</sup> |
| <i>mTERF17</i>  |                             |                            |                             |                            |                             |                            |                            |                            |                            |
| WT              | 1.000 ± 0.120 <sup>d</sup>  | 2.427 ± 0.255 <sup>e</sup> | 6.277 ± 0.581 <sup>f</sup>  | 2.066 ± 0.204 <sup>e</sup> | 2.184 ± 0.191 <sup>e</sup>  | 0.713 ± 0.069 <sup>c</sup> | 0.503 ± 0.048 <sup>c</sup> | 0.184 ± 0.021 <sup>a</sup> | 0.321 ± 0.035 <sup>b</sup> |
| <i>rpotmp-2</i> | 0.526 ±                     | 0.511 ±                    | 1.148 ±                     | 0.809 ±                    | 0.912 ±                     | 0.395 ±                    | 0.305 ±                    | 0.222 ±                    | 0.328 ±                    |

|                  |                            |                             |                            |                            |                             |                             |                             |                            |                            |
|------------------|----------------------------|-----------------------------|----------------------------|----------------------------|-----------------------------|-----------------------------|-----------------------------|----------------------------|----------------------------|
|                  | 0.053 <sup>c</sup>         | 0.049 <sup>c</sup>          | 0.131 <sup>d</sup>         | 0.087 <sup>d</sup>         | 0.085 <sup>d</sup>          | 0.040 <sup>b</sup>          | 0.040 <sup>b</sup>          | 0.025 <sup>a</sup>         | 0.036 <sup>b</sup>         |
| <i>mTERF18</i>   |                            |                             |                            |                            |                             |                             |                             |                            |                            |
| WT               | 1.000 ± 0.087 <sup>c</sup> | 1.596 ± 0.161 <sup>d</sup>  | 3.171 ± 0.320 <sup>e</sup> | 1.821 ± 0.199 <sup>d</sup> | 1.331 ± 0.128 <sup>cd</sup> | 2.158 ± 0.209 <sup>de</sup> | 0.851 ± 0.069 <sup>bc</sup> | 0.236 ± 0.031 <sup>a</sup> | 0.684 ± 0.066 <sup>b</sup> |
| <i>rpotmp-2</i>  | 1.213 ± 0.113 <sup>c</sup> | 2.425 ± 0.251 <sup>e</sup>  | 2.990 ± 0.266 <sup>e</sup> | 1.777 ± 0.164 <sup>d</sup> | 1.796 ± 0.149 <sup>d</sup>  | 1.676 ± 0.157 <sup>cd</sup> | 0.329 ± 0.044 <sup>b</sup>  | 0.159 ± 0.017 <sup>a</sup> | 0.859 ± 0.073 <sup>c</sup> |
| <i>At2g37320</i> |                            |                             |                            |                            |                             |                             |                             |                            |                            |
| WT               | 1.000 ± 0.144 <sup>c</sup> | 1.404 ± 0.161 <sup>c</sup>  | 6.649 ± 0.320 <sup>e</sup> | 2.894 ± 0.186 <sup>d</sup> | 2.168 ± 0.175 <sup>d</sup>  | 3.322 ± 0.360 <sup>d</sup>  | 0.374 ± 0.029 <sup>b</sup>  | 0.148 ± 0.011 <sup>a</sup> | 0.552 ± 0.049 <sup>b</sup> |
| <i>rpotmp-2</i>  | 0.738 ± 0.063 <sup>c</sup> | 1.417 ± 0.150 <sup>d</sup>  | 3.611 ± 0.369 <sup>e</sup> | 1.319 ± 0.164 <sup>d</sup> | 1.837 ± 0.171 <sup>d</sup>  | 1.681 ± 0.160 <sup>d</sup>  | 0.090 ± 0.006 <sup>a</sup>  | 0.084 ± 0.009 <sup>a</sup> | 0.359 ± 0.034 <sup>b</sup> |
| <i>At1g09190</i> |                            |                             |                            |                            |                             |                             |                             |                            |                            |
| WT               | 1.000 ± 0.108 <sup>c</sup> | 1.790 ± 0.139 <sup>d</sup>  | 3.017 ± 0.287 <sup>e</sup> | 1.825 ± 0.175 <sup>d</sup> | 1.316 ± 0.120 <sup>d</sup>  | 2.863 ± 0.293 <sup>e</sup>  | 0.841 ± 0.067 <sup>bc</sup> | 0.230 ± 0.020 <sup>a</sup> | 0.537 ± 0.055 <sup>b</sup> |
| <i>rpotmp-2</i>  | 1.396 ± 0.142 <sup>d</sup> | 2.004 ± 0.196 <sup>de</sup> | 2.671 ± 0.282 <sup>e</sup> | 1.769 ± 0.169 <sup>d</sup> | 1.788 ± 0.155 <sup>d</sup>  | 1.720 ± 0.163 <sup>d</sup>  | 0.356 ± 0.042 <sup>b</sup>  | 0.140 ± 0.013 <sup>a</sup> | 0.710 ± 0.088 <sup>c</sup> |
| <i>SWIB5</i>     |                            |                             |                            |                            |                             |                             |                             |                            |                            |
| WT               | 1.000 ± 0.123 <sup>c</sup> | 3.142 ± 0.307 <sup>d</sup>  | 9.815 ± 1.005 <sup>e</sup> | 6.386 ± 0.701 <sup>d</sup> | 5.809 ± 0.602 <sup>d</sup>  | 6.225 ± 0.519 <sup>d</sup>  | 0.675 ± 0.074 <sup>bc</sup> | 0.311 ± 0.029 <sup>a</sup> | 0.502 ± 0.058 <sup>b</sup> |
| <i>rpotmp-2</i>  | 1.444 ± 0.148 <sup>c</sup> | 2.993 ± 0.311 <sup>d</sup>  | 6.190 ± 0.717 <sup>e</sup> | 5.364 ± 0.549 <sup>e</sup> | 6.191 ± 0.593 <sup>e</sup>  | 3.410 ± 0.299 <sup>d</sup>  | 0.602 ± 0.059 <sup>b</sup>  | 0.376 ± 0.040 <sup>a</sup> | 0.666 ± 0.074 <sup>b</sup> |

**Table S3.** Effect of CK treatment on relative gene expression values of mitochondrial and nuclear genes. Seeds of *A. thaliana* wild-type were germinated in the dark for 4 days on full MS medium with or without cytokinin (1  $\mu$ M CK). Total RNAs were isolated from seedlings and analyzed by relative quantitative RT-PCR using *UBQ10* and *PP2A* as internal standards. The data presented in the table are the mean values ( $n \geq 3$ ). Error bars represent SEs. Different letters denote statistically significant differences between variants within the same genotype at  $p < 0.05$  (ANOVA with post hoc Tukey's multiple-comparison test), asterisks indicate statistically significant differences between the control variants of mutants and the wild type at  $p < 0.05$  (t-test).

| Gene           | MS                       | 1 $\mu$ M CK             |
|----------------|--------------------------|--------------------------|
| <i>RPOTm</i>   | 1.000±0.019 <sup>a</sup> | 1.041±0.209 <sup>a</sup> |
| <i>RPOTmp</i>  | 1.000±0.190 <sup>a</sup> | 0.084±0.012 <sup>b</sup> |
| <i>nad3</i>    | 1.000±0.145              | 0.213±0.023 <sup>b</sup> |
| <i>nad6</i>    | 1.000±0.158 <sup>a</sup> | 0.529±0.090 <sup>b</sup> |
| <i>cob</i>     | 1.000±0.217 <sup>a</sup> | 0.366±0.039 <sup>b</sup> |
| <i>cox1</i>    | 1.000±0.152 <sup>a</sup> | 0.119±0.026 <sup>b</sup> |
| <i>rps12</i>   | 1.000±0.169 <sup>a</sup> | 1.894±0.270 <sup>b</sup> |
| <i>rrn26</i>   | 1.000±0.209 <sup>a</sup> | 0.544±0.108 <sup>b</sup> |
| <i>atp6-1</i>  | 1.000±0.228 <sup>a</sup> | 0.397±0.055 <sup>b</sup> |
| <i>mTERF15</i> | 1.000±0.104 <sup>a</sup> | 0.622±0.225 <sup>b</sup> |
| <i>mTERF18</i> | 1.000±0.090 <sup>a</sup> | 0.446±0.043 <sup>b</sup> |

|                  |                          |                          |
|------------------|--------------------------|--------------------------|
| <i>At1g09190</i> | 1.000±0.234 <sup>a</sup> | 0.374±0.091 <sup>b</sup> |
| <i>At2g37320</i> | 1.000±0.035 <sup>a</sup> | 0.483±0.032 <sup>b</sup> |
| <i>SWIB5</i>     | 1.000±0.121 <sup>a</sup> | 0.622±0.132 <sup>b</sup> |

**Table S4.** Putative *cis*-regulatory elements for MYB and MY-related identified in the 1,200 bp Arabidopsis *RPOTmp* promoter sequence relative to ATG *in silico* (based on the results of analysis by PlantRegMap/PlantTFDB v5.0 accessed on 10 October 2023).

| Motif     | Family      | Seq ID    | Position  | Strand | Matched sequence      |
|-----------|-------------|-----------|-----------|--------|-----------------------|
| AT3G47600 | MYB         | At5g15700 | 503-521   | -      | CGACTAGTGGTTGGGTTGC   |
| AT2G02820 | MYB         | At5g15700 | 6-20      | +      | cctaaacgtccatt        |
| AT1G08810 | MYB         | At5g15700 | 503-521   | +      | gcaaccaaccactagtcg    |
| AT5G62470 | MYB         | At5g15700 | 497-514   | -      | TGGTTGGGTTGCTAGTTG    |
| AT3G23250 | MYB         | At5g15700 | 1148-1168 | -      | AACCAGAACAATAACCAACTC |
| AT1G66370 | MYB         | At5g15700 | 1148-1158 | +      | gagttgggttat          |
| AT3G28910 | MYB         | At5g15700 | 505-519   | +      | aaccaaccactagt        |
| AT5G02320 | MYB         | At5g15700 | 845-859   | +      | gacttggggccgtta       |
| AT2G32460 | MYB         | At5g15700 | 1148-1162 | -      | AACAATAACCAACTC       |
| AT5G11510 | MYB         | At5g15700 | 846-860   | +      | acttggggccgttat       |
| AT5G40330 | MYB         | At5g15700 | 275-285   | -      | AAGCTTGTTC            |
| AT1G74650 | MYB         | At5g15700 | 468-482   | -      | TAACCTCACACCTGAT      |
| AT5G62470 | MYB         | At5g15700 | 465-482   | +      | ataatcaggtgtgagttta   |
| AT5G06100 | MYB         | At5g15700 | 1148-1158 | -      | ATAACCAACTC           |
| AT4G32730 | MYB         | At5g15700 | 846-860   | +      | acttggggccgttat       |
| AT1G09540 | MYB         | At5g15700 | 507-521   | +      | ccaaccactagtcg        |
| AT5G02840 | MYB_related | At5g15700 | 926-935   | +      | agatatatttt           |
| AT4G01280 | MYB_related | At5g15700 | 926-936   | +      | agatatatttta          |
| AT1G18330 | MYB_related | At5g15700 | 924-935   | -      | AAAAATATCTAC          |
| AT5G52660 | MYB_related | At5g15700 | 926-936   | +      | agatatatttta          |
| AT3G09600 | MYB_related | At5g15700 | 926-937   | +      | agatatatttaa          |
| AT1G01060 | MYB_related | At5g15700 | 926-935   | +      | agatatatttt           |
| AT5G17300 | MYB_related | At5g15700 | 924-937   | -      | TAAAAAATATCTAC        |
| AT5G67580 | MYB_related | At5g15700 | 915-933   | -      | AAATATCTACCCTAAATTC   |
| AT1G18960 | MYB_related | At5g15700 | 697-718   | -      | CCAATTAATCAACAACAAAAA |
| AT3G10113 | MYB_related | At5g15700 | 924-938   | -      | ATAAAAAATATCTAC       |
| AT2G46830 | MYB_related | At5g15700 | 926-933   | -      | AAATATCT              |

**Table S5.** Primers for plasmid constructions, sequencing and qRT-PCR

| Name/ Purpose                             | Primer Name                  | Primer sequence* (5'-> 3')                               |
|-------------------------------------------|------------------------------|----------------------------------------------------------|
| p958/cloning<br>P958::GUS                 | 15700-958 Bam HI             | ATT <u>GGA TCC</u> ATC AGT AAT TAG TAA TTT ACC TCA       |
| cloning <i>Pro::GUS</i><br>general primer | 15700-R1 Pst I               | AAT <u>CTG CAG</u> AAT CGA ACT TAA AAA TTG AG            |
| <i>GUS</i> /PCR and qRT-PCR               | <i>GUS_F</i><br><i>GUS_R</i> | CCT CGC ATT ACC CTT ACG CT<br>AAG ACA GCT GAA AGC CGA CA |

|                           |                                          |                                                                      |
|---------------------------|------------------------------------------|----------------------------------------------------------------------|
| <i>RPOTm</i> /qRT-PCR     | <i>RPOTm_F</i><br><i>RPOTm_R</i>         | ATA TGC CAA ACT CAT GCT CG<br>CTG TTT GAC CAG CTT TCT GTC            |
| <i>RPOTmp</i> /qRT-PCR    | <i>RPOTmp_F</i><br><i>RPOTmp_R</i>       | CGT TTC CTC ATT TAG ACT TTC CTC C<br>CCT TCT CTC TGT CTG CGT CTC TGT |
| <i>nad6</i> /qRT-PCR      | <i>nad6_F</i><br><i>nad6_R</i>           | TAT GCC GGA AAG GTA CGA AG<br>GTG AGT GGG TCA GTC GTC CT             |
| <i>nad3</i> /qRT-PCR      | <i>nad3_F</i><br><i>nad3_R</i>           | ACC TTT TTC TTT CCT TGG GCA GT<br>CGA AGC ACC CCT TTT CCA TTC A      |
| <i>cob</i> /qRT-PCR       | <i>cob_F</i><br><i>cob_R</i>             | TGC CGC AAT GGT ATT TCC TA<br>GCC AAA AGC AAC CAA AAC AT             |
| <i>cox1</i> /qRT-PCR      | <i>cox1_F</i><br><i>cox1_R</i>           | AGT CAT TCT GGA GGA GCA GTT GA<br>ACG GAC CAC ACA AAT AGG GGT AA     |
| <i>atp6-1</i> /qRT-PCR    | <i>atp6-1_F</i><br><i>atp6-1_R</i>       | TCT TTT GCG AGT CAA TGC AC<br>TCT CGC GTA TCT CAC ATT GC             |
| <i>ccMc</i> /qRT-PCR      | <i>ccMc_F</i><br><i>ccMc_R</i>           | AGC TAC GCG CAA ATT CTC AT<br>GCC GTG GCG ATA TAA ACA AT             |
| <i>ccMF</i> /qRT-PCR      | <i>ccMF_F</i><br><i>ccMF_R</i>           | CAC ATG GAG GAG TGT GCA TC<br>GTG GGT CCA TGT AAA TGA TCG            |
| <i>rps4</i> /qRT-PCR      | <i>rps4_F</i><br><i>rps4_R</i>           | ACC CAT CAC AGA GAT GCA CA<br>TCA CAC AAA CCC TTC GAT GA             |
| <i>mttB</i> /qRT-PCR      | <i>mttB_F</i><br><i>mttB_R</i>           | GGG GTC TTT CTT TGG AAA CC<br>TCT CCC TCA TTC CAC TCG TC             |
| <i>matR</i> /qRT-PCR      | <i>matR_F</i><br><i>matR_R</i>           | AAT TTT TGC GAG AGC TGG AA<br>TTG AAC CCC GTC CTG TAG AC             |
| <i>rrn26</i> /qRT-PCR     | <i>rrn26_F</i><br><i>rrn26_R</i>         | GAC GAG ACT TTC GCC TTT TG<br>CTT GGA GCG AAT TGG ATG AT             |
| <i>mTERF15</i> /qRT-PCR   | <i>mTERF15_F</i><br><i>mTERF15_R</i>     | TCG TGC TGG GTT TGA AGT GAA<br>ACC CTC GGC TCT TTC CAT AC            |
| <i>mTERF17</i> /qRT-PCR   | <i>mTERF17_F</i><br><i>mTERF17_R</i>     | TCT TTA GTT GCC GTC TTG TCC T<br>TCT ATC GCG GGT TTG ATC TT          |
| <i>mTERF18</i> /qRT-PCR   | <i>mTERF18_F</i><br><i>mTERF18_R</i>     | GAG TGC CGT CGA AAT ACA AGT<br>GGT GGT GTG GAG ATA GTC TGT A         |
| <i>At2g37320</i> /qRT-PCR | <i>At2g37320_F</i><br><i>At2g37320_R</i> | AAG CGG AAC AAA GCC AGA TG<br>CCG TGT TCC GCC ATC AAA T              |
| <i>At1g09190</i> /qRT-PCR | <i>At1g09190_F</i><br><i>At1g09190_R</i> | ACA GGT CAG GTG GAG AGA GGA GA<br>CGT AAT GCT CGG TTC TCG CCT        |
| <i>SWIB5</i> /qRT-PCR     | <i>SWIB5_F</i><br><i>SWIB5_R</i>         | ATG GCG GGA ATT TCT AGG GT<br>GCT ACA GTA ACG GCC TCA ACA            |
| <i>IAA19</i> /qRT-PCR     | <i>IAA19_F</i><br><i>IAA19_R</i>         | ACG AAG ACA AAG ATG GAG ACT GGA<br>GTC ATC ATC ACT CGT CTA CTC CTC T |
| <i>DWF4</i> /qRT-PCR      | <i>DWF4_F</i><br><i>DWF4_R</i>           | GTT GGC CAT TTC TTG GTG AAA<br>TGG CGG TGT ACG GTT TAA GAT           |
| <i>ERF-1</i> /qRT-PCR     | <i>ERF-1_F</i><br><i>ERF-1_R</i>         | ATT AGG GTT TGG CTC GGG AC<br>GAC TCT TGA ACT CTC TCC GCC G          |
| <i>GA3</i> /qRT-PCR       | <i>GA3_F</i><br><i>GA3_R</i>             | AGTCTCTTCGGGCTACCTGT<br>CGGAAATCGTTGAGAGGCG                          |
| <i>RD29</i> /qRT-PCR      | <i>RD29_F</i><br><br><i>RD29_R</i>       | AGG AAC CAC CAC TCA ACA CAC<br><br>GCT CGT CAT CAT CAT CAT CTT C     |

|               |         |                                   |
|---------------|---------|-----------------------------------|
| ARR5/qRT-PCR  | ARR5_F  | CTA CTC GCA GCT AAA ACG C         |
|               | ARR5_R  | GCC GAA AGA ATC AGG ACA           |
| PR1/qRT-PCR   | PR1_F   | TTC ACA ACC AGG CAC GAG GA        |
|               | PR1_R   | CCA GCG TAG TTG TAG TTA GCC TTC   |
| UBQ10/qRT-PCR | UBQ10_F | GCG TCT TCG TGG TGG TTT CTA A     |
|               | UBQ10_R | GAA AGA GAT AAC AGG AAC GGA AAC A |

\*Sequences for restriction sites Bam HI and Pst I are underlined.

-1200

AAAACTCTAAACGCTCCATTCAAATCAAATCAAACCATTAGCTATATAGACGACTTAGATCCCCAAAC**CCAACGAAGATCACT** RAV1

CGATCATCGACCAACAGAAGTATC**AGATCCTC**AGAGCAAAAAACCCAGCAGAAGAACAACGAAGTGGCCACAAAGGAAGTCAAAAC SORLI1AT

TCAGGTAGAAATCAATCGGAAGCTACGCAATCAGCTAGCCTGGAGTTGGAGCA**AGATTTCGA**ACTTTGGATCAGTAATTAGTAATT ARR-B P958->

TACCT**CAACA**TATTATG**CAACA**AGCTTCGTCCTTTTGTAGTAACACGAAGAAGAGAGAGATAGAGAGAGAGACCTAATACAATTTCT AB3VP1 AB3VP1

TTGTAGCTTCAGTTCGAGGAAAGGAAACAAATCAGGCTTGTTACTTCT**TCAGACAAAA**GTTAAGGGGTAAATGGTAATATATTAA ARF

AACTATGAGGTGGAACGATCAAATTTGGAGCGAATAATCAGGTGTGAGTTATCATTTGGTGAAACACAACCTAGCAACCCCAACCACT

AGTCGACACATCCCAAGAAAAATAGATTTTTAGTCCAAATTTATTTACAAATAATAGACTAGAATAATTATTATTAAACACAAATTG

AT**TTGTTGACCAAAAAATAAA**ATCCAAGTGAATTATTCATACAAAAATCTAAATATTTTAATTATATTCGGCATTGTAATTGGG W box ARF

TTCCACCTTTTTTTGTTGTTGATTAATTGGGTCCACTAAAAAGTTGTATGAAATGGTAAAAATAATAGAAGAAACTATAATAAAA

TTCAATTTTG**TATATATATA**TTTAACTAATTGGGCTCCATAAATTCGTCAAGCCTTTTGCATAT**TTAACTGACTTT**GGCCGTTAT DOF

TAGAGGCCCTTAATCAGATACTTCC**GGGTCGGGTAAGATCCTC**CTATACGGGTGCAATTTAGGGTAGATATTTTAAATTTATTTT ARF ARR-B

TAATTGTTTG**ATGTCAGAAACAGAGAC**AAACCAGAAAA**AAAAACAGAGGC**TTAAGAAAGCAAGGGTTTTTAAGCGAG**GGTTTA** TSS AtMYC2 RD22 REF6 REF6 ERF (DREB2)

**GGC-box** **GGCGGC****TTCTGTCGT**GTACGCTTCACTCAC**ATTG**TTTTTATTTCTTCGCTATGAACTCTTCCCAATTTGCCATTTTCTT TSS

TGCTCATGCATCGAATTTATTCAATCTCGAGTTGGTTATTGTTCTGGTTATCGATTTTACTCAATTTTAAAGTTTCGATT**ATG** +1

CCAGTGCTCAAACCCCACTGTTCTTGGCAAATCAGACTAAGGTATT

**Figure S1.** Nucleotide sequence (−1200/+ 50 bp) of the *RpoTnp* gene from *Arabidopsis thaliana* with distribution of *cis*-regulatory elements located with PLAN, AGRIS, PLACE, PlantTFDB v5.0. The motifs for CREs (see Table 1) were searched in the 1200 bp upstream of the translation initiation codon (bold). The 5'-UTR sequence (for *At5g15700.1* transcript) is shown in italics and marked with grey. Partial coding sequence is shown in grey letters (+50 bp). TATA boxes indicated in the frame and transcriptional start sites (TSS) printed in bold red letters were determined using the TSSPlant tool PlantProm DB on SoftBerry platform (<https://www.softberry.com/> (accessed on 10 October 2023)). Significant motifs with the highest nucleotide similarity to previously identified transcription factor binding sites are shown in bold and the name of the corresponding transcription factor is given above the motif. The start position of the 5'-deletion fragment P958 is indicated by an arrow relative to ATG.

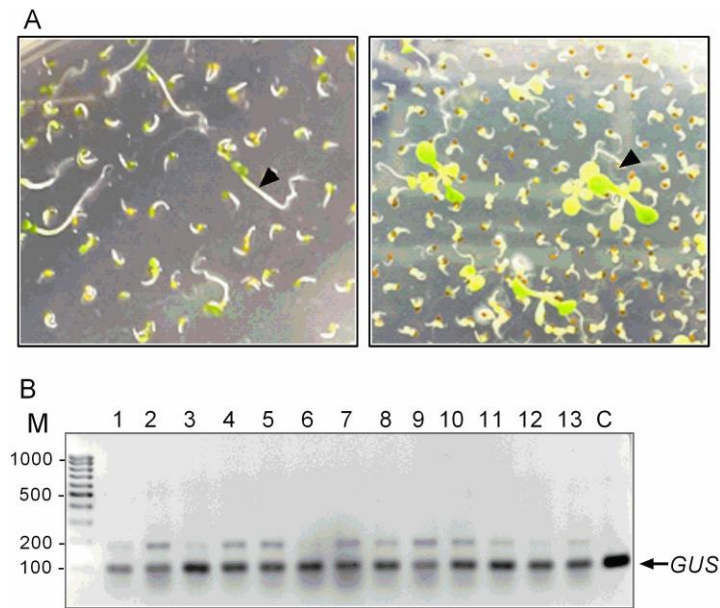

**Figure S2.** Generation of *RPOTmp pro::GUS* transgenic *Arabidopsis* plants. (A) Selection of T-seedlings carrying the P958 constructs on  $\frac{1}{2}$ MS medium containing 0.8% (w/v) phyto agar (Duchefa Biochemie, Haarlem, The Netherlands) and 30 mg/L hygromycin (Hyg). Hyg-resistant seedlings (left photo) had more elongated hypocotyl after 3 days of growth in darkness compared to untransformed plants. Phenotype of 10-days-old transgenic seedlings (right panel) used for further analysis. (B) PCR analysis of genomic DNA extracted from rosette leaves of P958 transgenic plants using *GUS*-specific primers (Table S1), where C is the control for PCR with pCambia-35SGUS plasmid. The position of the *GUS* gene fragment (100 bp) is indicated by an arrow. M – 100 bp DNA marker (SybEnzyme, Moscow, Russia).
